# Supplementary material for: A comparison of heat-stress transcriptome changes between wild-type Arabidopsis pollen and a heat-sensitive mutant harboring a knockout of cyclic nucleotide-gated cation channel 16 (cngc16)
Source: BMC Genomics. 2018 Jul 24;19:549. doi: 10.1186/s12864-018-4930-4 (PMC6057101; doi:10.1186/s12864-018-4930-4)
Supplement: Supplementary file 5 — A transcript profile comparison to evaluate purity of pollen samples used for RNA-Seq. A subset of 12 genes was used to compare relative purities of pollen samples in the current pollen transcriptome study to those from a RNA-Seq study from Loraine et al. [22] (yellow highlights) or a microarray experiment from Qin et al. 2009 [23] (purple highlights). Four references genes were chosen to generate normalization factors that could be used to adjust expression values in Loraine et al. [22] and Qin et al. 2009 [23] to allow a relative comparison of the three data sets for WT pollen under control (normal) conditions. For a control group, three CNGC genes were chosen that displayed low to moderate levels of expression (Tunc-Ozdemir et al. 2013 [24] and Frietsch et al. 2007 [25]). As markers for potential contamination from photosynthetic tissues, five different nuclear encoded genes were chosen that are associated with either photosystems I/II, or chlorophyll A-B binding proteins (Umate 2010 [26]). Average relative ratios are shown for each of the four different pollen samples in comparison to both Loraine et al. [22] and Qin et al. [23]. (XLSX 19 kb) [file 12864_2018_4930_MOESM5_ESM.xlsx]

## Sheet: Additional File 5
Additional file 5. A transcript profile comparison to evaluate purity of pollen samples used for RNA-Seq. A subset of 12 genes was used to compare relative purities of pollen samples in the current pollen transcriptome study to those from a RNA-Seq study from Loraine et al. [22] (yellow highlights) or a microarray experiment from Qin et al. 2009 [23] (purple highlights). Four references genes wer…
			RNA-Seq (this study, Ishka et al. )				Normalization of pollen grain RNA-Seq study from Loraine et al., 2013 (PMCID:PMC3668042), to allow comparisons to this this RNA-Seq study (Ishka et al.,)		Ratio of this RNA-Seq study (Ishka et al.,) to normalized values derived from Loraine et al. 2013 (PMCID:PMC3668042)				Normalization of pollen grain microarray study from Qin et al., 2009 (PMCID: PMC2726614), to allow comparisons to this RNA-Seq study (Ishka et al.,)		Ratio of this RNA-Seq study (Ishka et al.,) to normalized values derived from Qin et al. 2009 (PMCID: PMC2726614)
Gene ID	Symbol	Description	WT_control (normal) Expression Average	WT_heat Expression Average	cngc16_control (normal) Expression Average	cngc16_heat Expression Average	Pollen RPKM from Loraine et al.	Normalized Expression values relative to Ishka et al., (normalization factor = x 49.3)	Ratio of WT_control (normal) over normalized pollen from Loraine et al.	Ratio of WT_heat over normalized pollen from Loraine et al.	Ratio of cngc16_control (normal) over normalized pollen from Loraine et al.	Ratio of cngc16_heat over normalized pollen from Loraine et al.	Average Signal_Dry Pollen from Qin et al.	Normalized Expression values relative to Ishka et al., (normalization factor = x 0.9)	Ratio of WT_control (normal) over normalized Pollen from Qin et al.	Ratio of WT_heat over normalized Pollen from Qin et al.	Ratio of cngc16_control (normal) over normalized Pollen from Qin et al.	Ratio of cngc16_heat over normalized Pollen from Qin et al.
Reference genes used for normalization of Pollen RNA-Seq from Loraine et. al., and Qin et. al., to allow comparisons of expression values
AT2G35635	UBQ7	ubiquitin 7	82.6251	96.113	101.981	100.981	3.9839	196.406	0.420685	0.489358	0.519233	0.514144	84.8985	76.4087	1.08136	1.25788	1.33467	1.32159
AT3G02360	AT3G02360	6-phosphogluconate dehydrogenase family protein	682.967	744.712	699.002	656.948	18.2047	897.492	0.760973	0.829771	0.778839	0.731983	803.628	723.265	0.944283	1.02965	0.966454	0.90831
AT3G01120	MTO1	Pyridoxal phosphate (PLP)-dependent transferases superfamily protein	1081.55	1176.8	1194.3	1076.43	17.2304	849.459	1.27322	1.38535	1.40595	1.26719	1028.85	925.963	1.16803	1.27089	1.28979	1.1625
AT2G24640	UBP19	ubiquitin-specific protease 19	117.786	133.367	118.459	105.621	1.5484	76.3361	1.54299	1.7471	1.55181	1.38363	160.565	144.508	0.815078	0.9229	0.819739	0.730896
									Avg = 1	1.11289	1.06396	0.974236			Avg = 1	1.12033	1.10266	1.03082
Control group genes used for independent comparison across different data set
AT1G15990	CNGC7	cyclic nucleotide gated channel 7	99.724	204.099	76.068	171.579	3.1697	156.266	0.638167	1.3061	0.486785	1.09799	179.197	161.277	0.618339	1.26552	0.47166	1.06388
AT1G19780	CNGC8	cyclic nucleotide gated channel 8	1103.32	1473.06	794.653	1117.91	27.4014	1350.89	0.816735	1.09044	0.588244	0.827537	849.663	764.697	1.44282	1.92633	1.03917	1.4619
AT5G14870	CNGC18	cyclic nucleotide-gated channel 18	3740.7	4158.24	2989.05	2620.47	48.2928	2380.84	1.57117	1.74655	1.25546	1.10065	1040.5	936.453	3.99455	4.44041	3.19189	2.7983
									Avg = 1.01	1.38103	0.776831	1.00873			Avg = 2.10	2.54409	1.56757	1.77469
Chloroplast-related genes used to evaluate contaminatin from photosynthetic tissues
AT1G45474	LHCA5	photosystem I light harvesting complex protein 5	4.17	4.378	4.701	12.919	3.0566	150.69	0.0276726	0.0290529	0.0311964	0.0857321	63.8191	57.4372	0.0726011	0.0762224	0.081846	0.224924
AT4G17600	LIL3:1	Chlorophyll A-B binding family protein	3.40422	4.14677	10.3257	16.0194	0.0937	4.61941	0.736938	0.897684	2.23528	3.46784	25.323	22.7907	0.149369	0.18195	0.453065	0.702889
AT1G76570	AT1G76570	Chlorophyll A-B binding family protein	96.637	39.485	65.077	21.866	1.2443	61.344	1.57533	0.643665	1.06085	0.356449	146.62	131.958	0.73233	0.299223	0.493164	0.165704
AT5G01530	LHCB4.1	light harvesting complex photosystem II	48.8206	56.3141	69.5622	151.871	0.3453	17.0233	2.86787	3.30806	4.0863	8.92134	83.4162	75.0746	0.650295	0.750108	0.926574	2.02293
AT2G40100	LHCB4.3	light harvesting complex photosystem II	3.78109	6.17466	6.36142	18.2044	0.0209	1.03037	3.66964	5.99266	6.17392	17.6678	66.3269	59.6942	0.063341	0.103438	0.106567	0.304961
									Avg =1.78	2.17422	2.71751	6.09984			Avg = 0.33	0.282188	0.412243	0.684281
